# Supplementary material for: Thermal and conductivity properties of poly(ethylene glycol)-based cyclopolymersElectronic supplementary information (ESI) available: 1H NMR spectra and gel permeation chromatography traces of polymers 4, 5a and 6 after purification by precipitation in the non-solvent. See http://www.rsc.org/suppdata/jm/b4/b402677b/
Source: Royal Society of Chemistry journal article supplement (doi:10.1039/b402677b), 2004-01-01
Supplement: b402677b.doc [file b402677b.doc]

Supplementary Information Available

Thermal and Conductivity Properties

of Polyethylene Glycol-Based Cyclopolymers

Enrique Blazquez,a Piercarlo Mustarelli,*,b Dario Pasini,*,a Pier Paolo Righetti,a Corrado Tomasib

a) Department of Organic Chemistry, University of Pavia, Viale Taramelli, 10 – 27100 Pavia – Italy.

b) Department of Physical Chemistry “M. Rolla”, University of Pavia, IENI-CNR and INFM, Viale Taramelli, 16 – 27100 Pavia – Italy.

[mustarelli@matsci.unipv.it](mailto:mustarelli@matsci.unipv.it), [dario.pasini@unipv.it](mailto:dario.pasini@unipv.it)

Corresponding authors: tel.: ++39-0382-507205; fax: ++39-0382-507575 (Piercarlo Mustarelli). Tel.: ++39-0382-507312; fax: ++39-0382-507323 (Dario Pasini).

1H NMR spectra of polymers **4**, **5a** and **6** after purification by precipitation in the nonsolvent, and Gel Permeation Chromatography traces for polymers **4**, **5a** and **6** in the condition reported in Table 1.

**Figure S1 .** 1H NMR spectra (300 MHz, CDCl3), of monomer **1** (top) and polymer **4** (bottom).

**Figure S2.** 1H NMR spectra (300 MHz, CDCl3), of polymer **5a** (top) and polymer **6** (bottom).


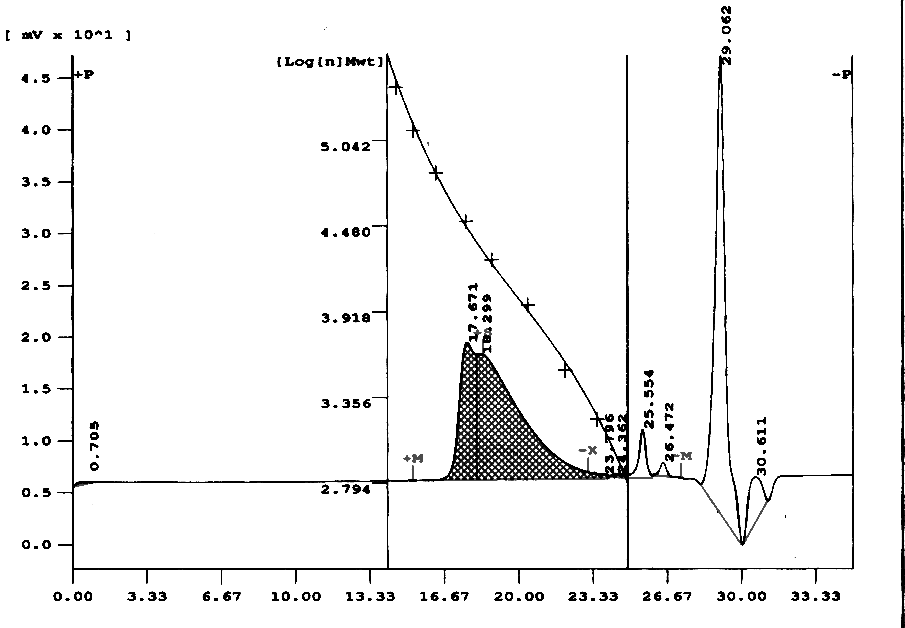


**Figure S3.** Gel permeation chromatograms for polymer **4**, after precipitation in cyclohexane, relative to entry 1 in Table 1.


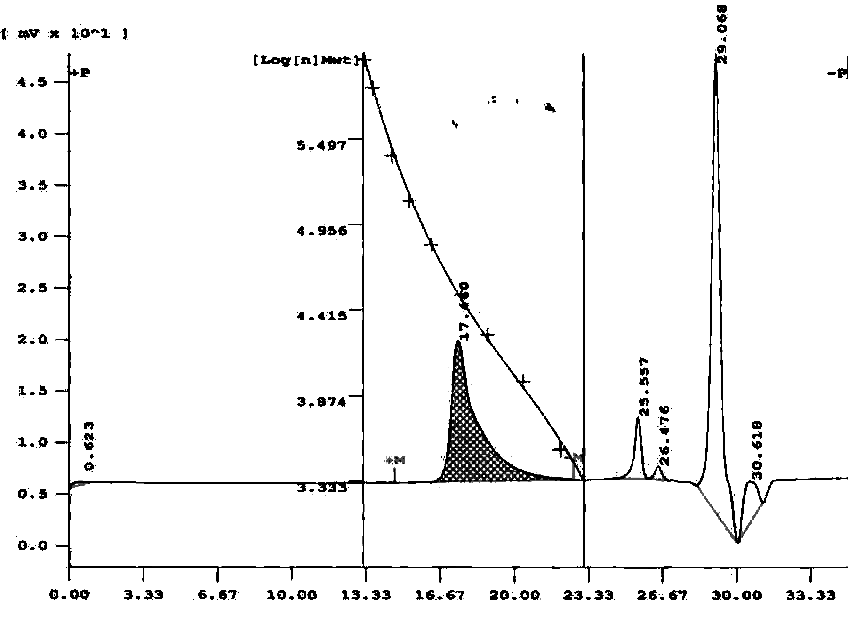


**Figure S4.** Gel permeation chromatograms for polymer **4**, after precipitation in cyclohexane, relative to entry 2 in Table 1.


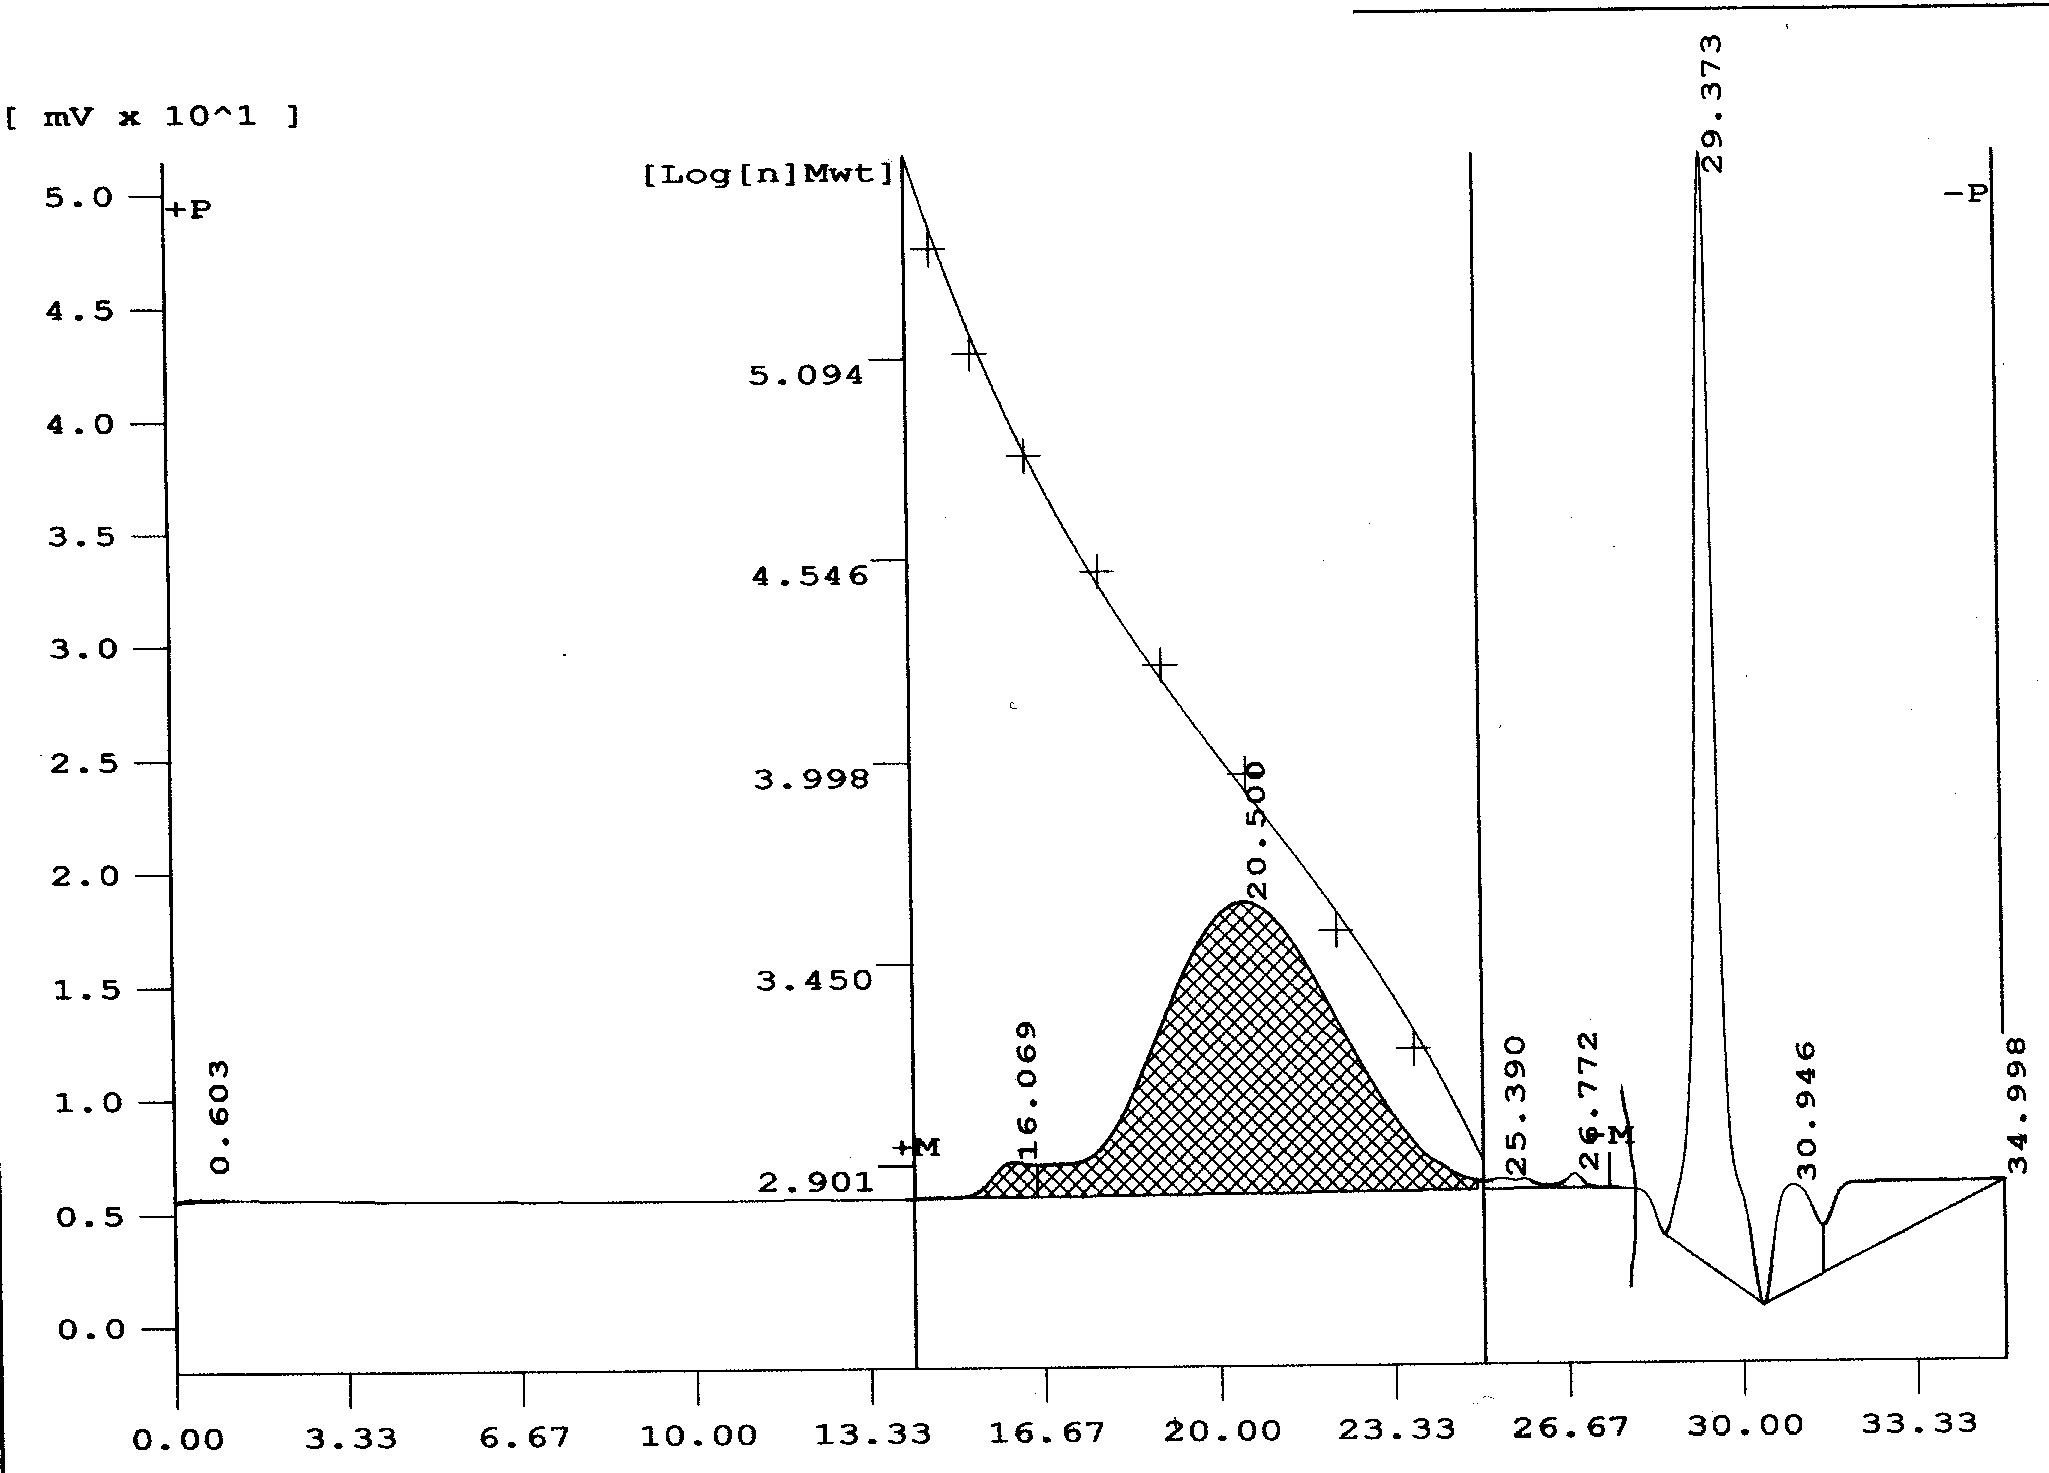


**Figure S5.** Gel permeation chromatograms for polymer **5a**, after precipitation in cyclohexane, relative to entry 3 in Table 1.


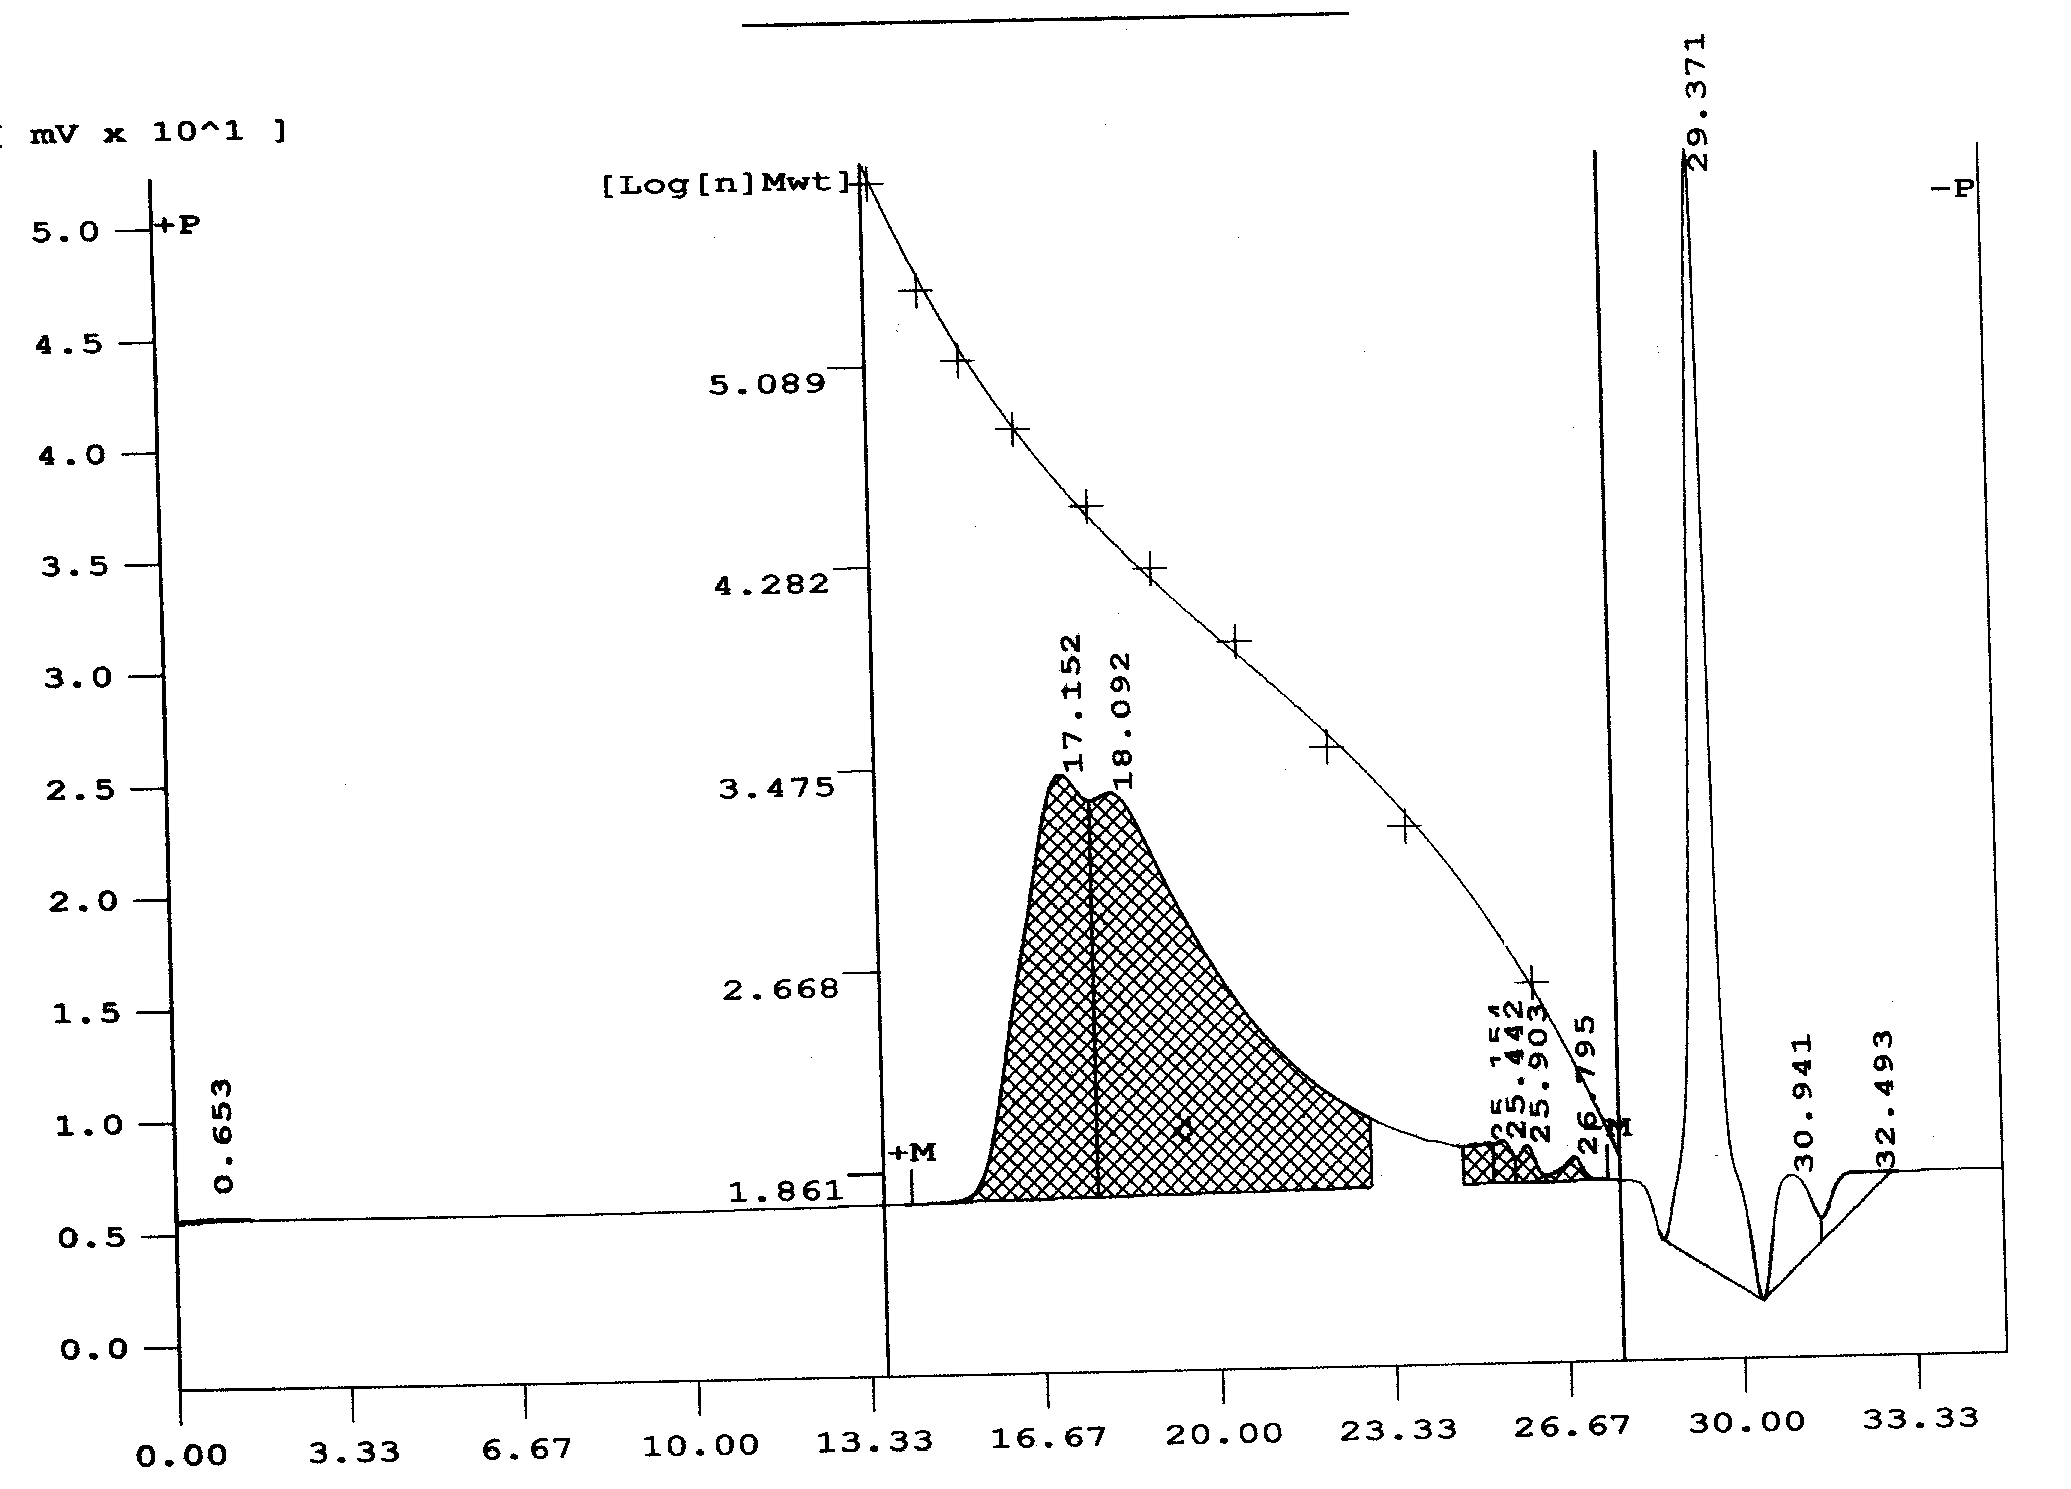


**Figure S6.** Gel permeation chromatograms for polymer **6**, after precipitation in cyclohexane, relative to entry 4 in Table 1.
